# Supplementary material for: LC3A Silencing Hinders Aggresome Vimentin Cage Clearance in Primary Choroid Plexus Carcinoma
Source: PubMed Central journal article supplement (PMC5556083; doi:10.1038/s41598-017-07403-5), 2017-08-14
Supplement: 41598_2017_7403_MOESM1_ESM.pdf [file 41598_2017_7403_MOESM1_ESM.pdf]

# **LC3A Silencing Hinders Aggressive Vimentin Cage Clearance in Primary Choroid Plexus Carcinoma**

## **Authors:**

Marwa Nassar <sup>1, 4, 7</sup>, Heba Samaha <sup>1, 7</sup>, Myret Ghabrial <sup>1</sup>, Maha Yehia <sup>2</sup>, Hala Taha <sup>2, 6</sup>, Sherin Salem <sup>3, 6</sup>, Khaled Shaaban <sup>3, 6</sup>, Mariam Omar <sup>1</sup>, Nabil Ahmed <sup>1, 5</sup> and Shahenda El-Naggar <sup>1 \*</sup>

Supplemental Figures:

Figure S1:

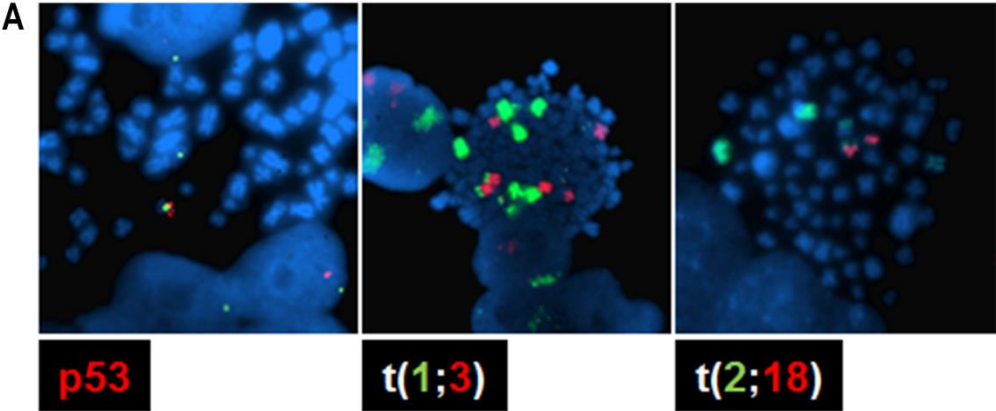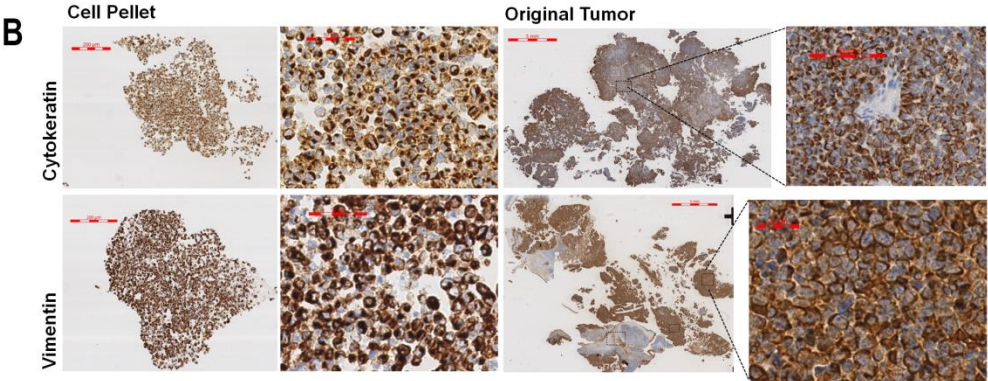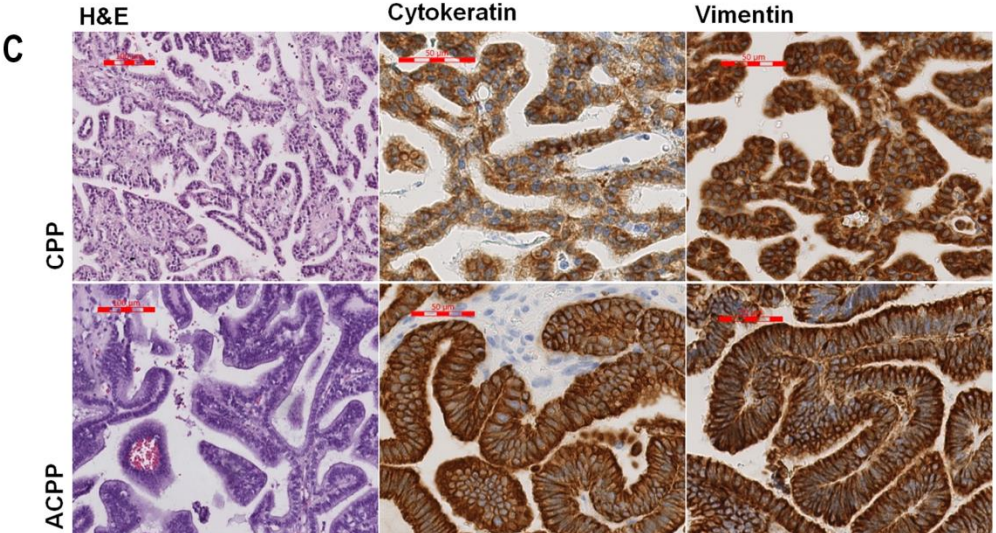

**Figure S2:**

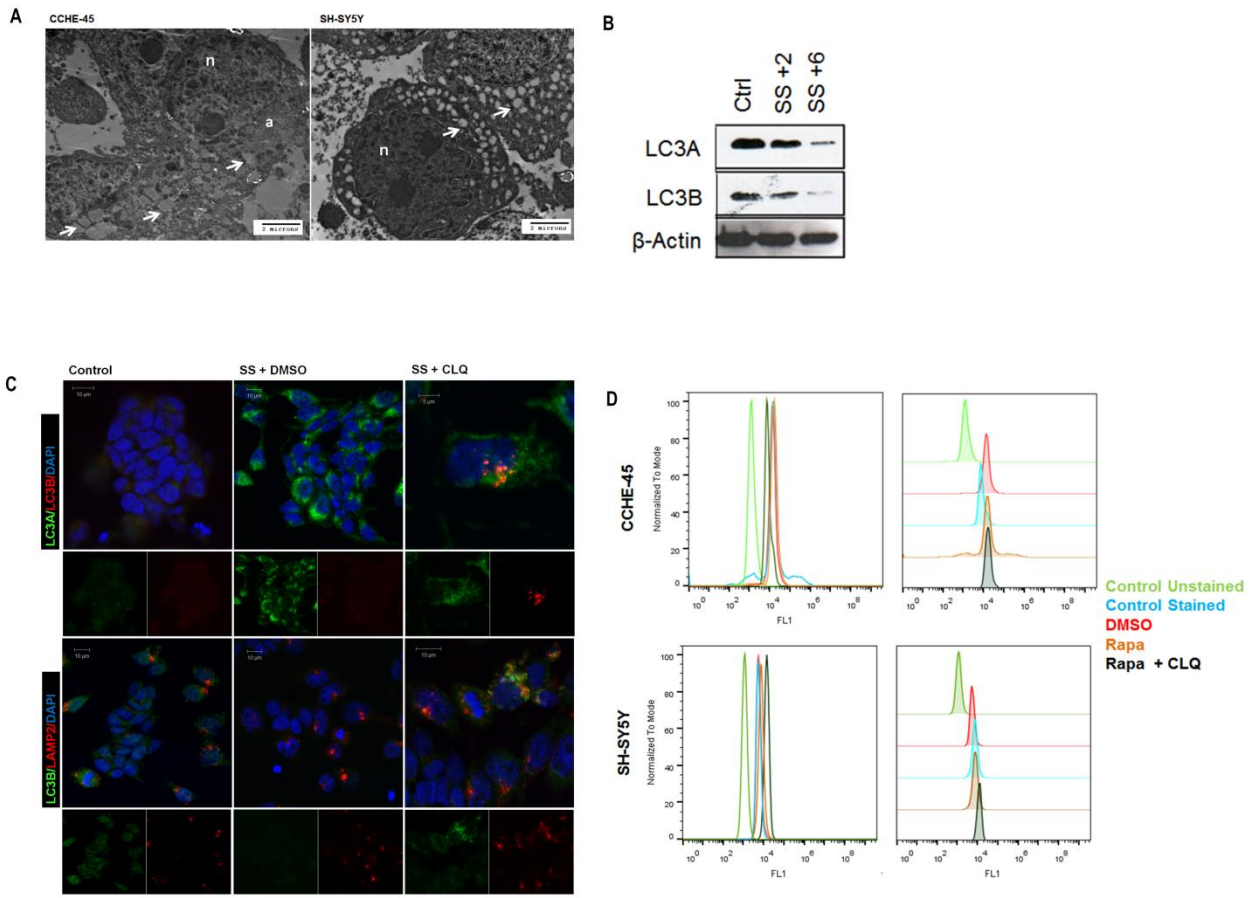

Figure S3:

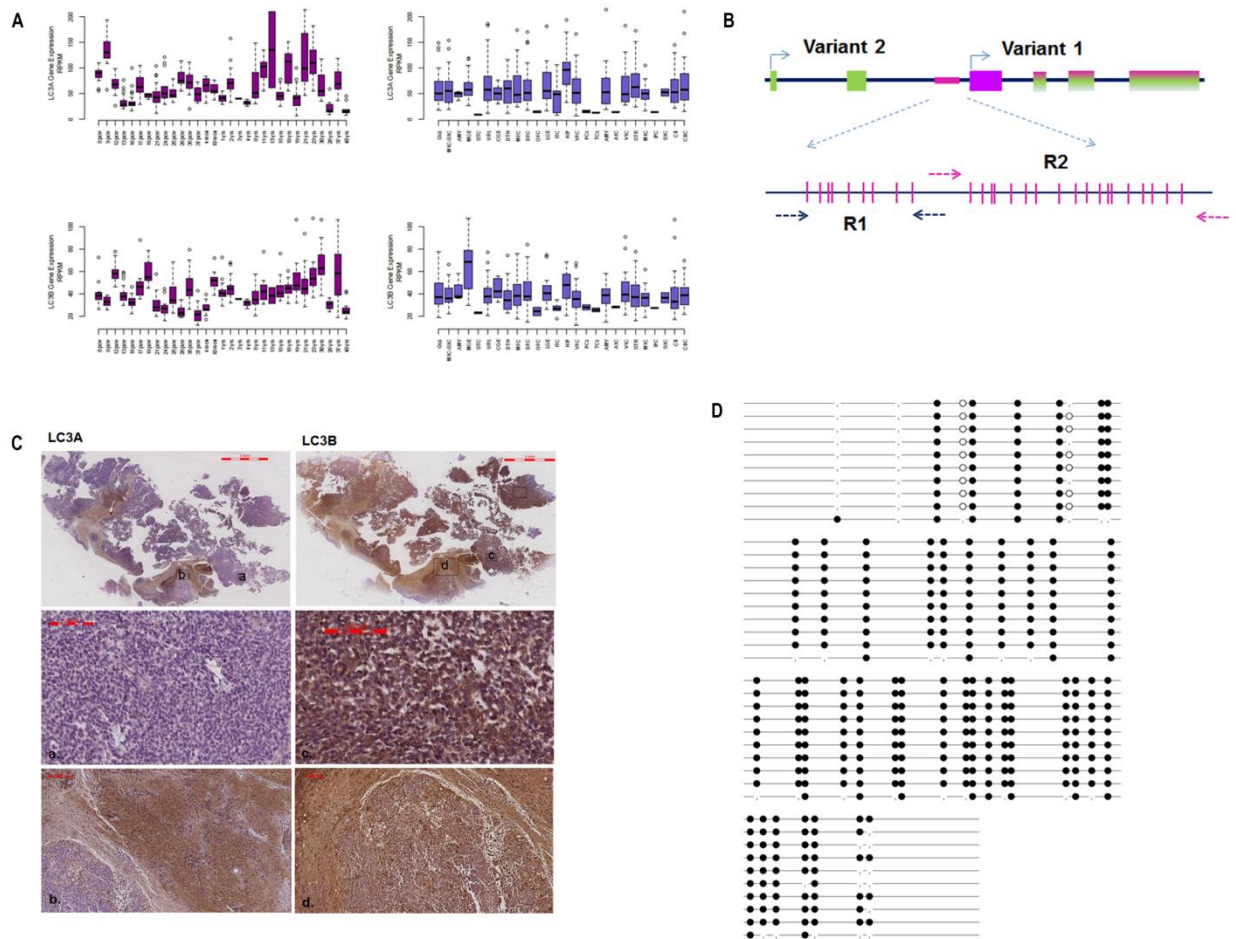

Figure S4:

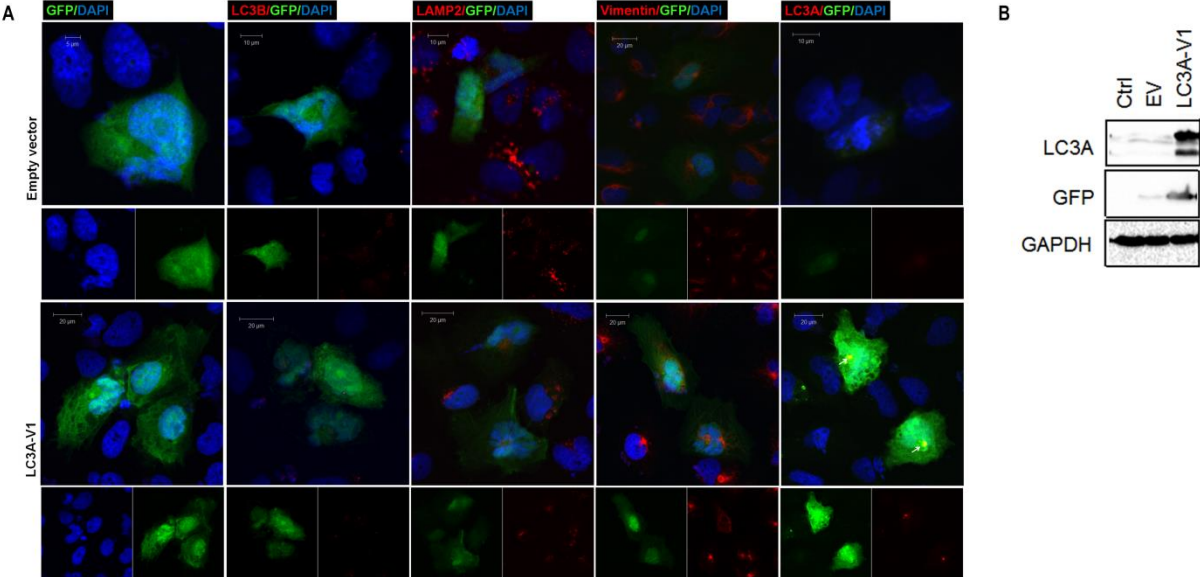

**Figure S5:**

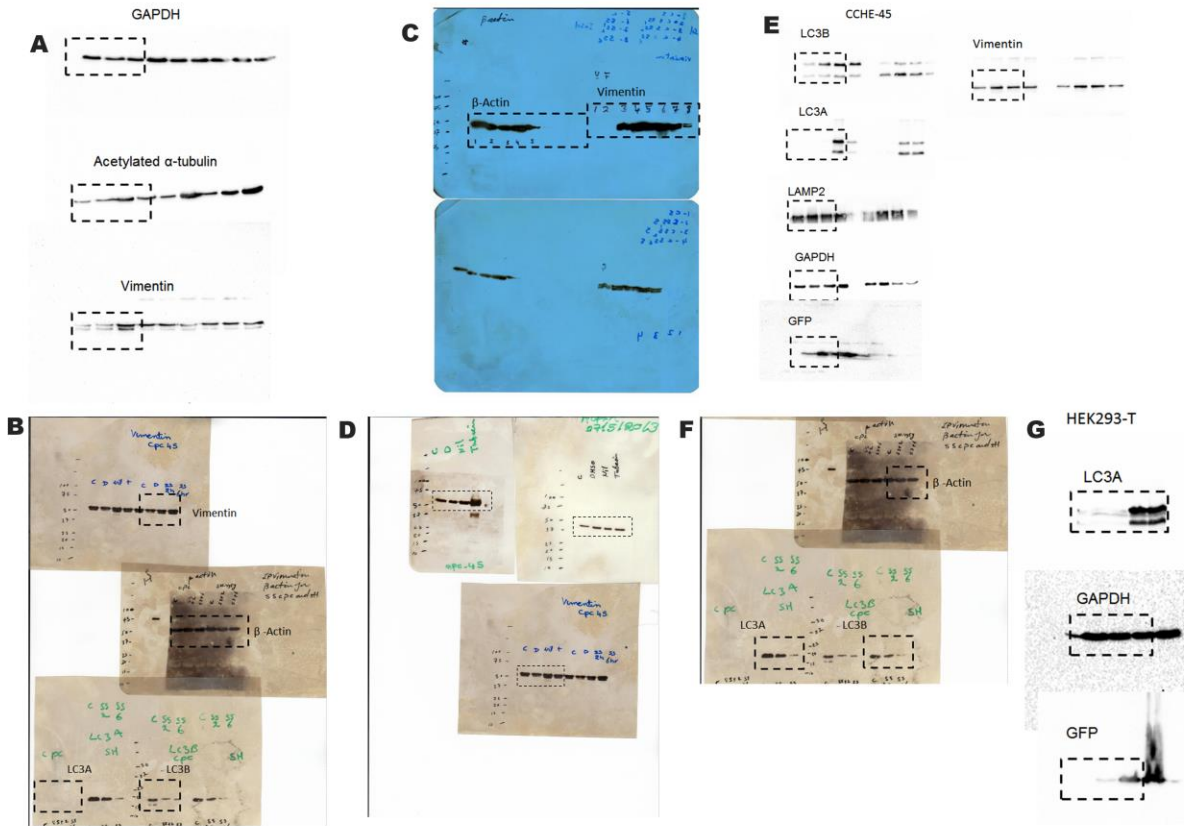

## Supplemental Figures Legend

**Figure S1: Aggresomes detected in CCHE-45 cells are present in the original tumor and absent in both CPP and ACPP.**

**A.** FISH analysis using red and green probes to detect *TP53* gene and centromere respectively, translocation t(1;3) and translocation t(2;18).

**B.** CCHE-45 cell pellet and the original tumor were immuno-stained with cytokeratin and vimentin indicated by para nuclear localization of vimentin and cytokeratin.

**C.** CPP and ACPP FFPE tissue hematoxylin and eosin (H&E) preparation and immunohistochemical analysis for vimentin and cytokeratin (Ventana, Tucson, Arizona, USA). Diffused staining for vimentin and cytokeratin detected in both tumors.

**Figure S2: Induction of autophagy in CCHE-45 and SH-SY5Y cells.**

**A.** TEM examination of CCHE-45 and SH-SY5Y cells using JEM-1400 T (JEOL). Cells were serum starved in HBSS for 2 hours before fixation for TEM analysis. a = aggresomes, n = nucleus, white arrow = autophagic vacuoles.

**B.** Western blot analysis of SH-SY5Y cells. Cells were left untreated (Ctrl) or serum starved in HBSS for 2 and 6 hours.

**C.** Immunostaining of SH-SY5Y cells cultured under normal conditions or serum starved in HBSS for 5 hours or serum starved and treated with 50  $\mu$ M chloroquine. Cells were fixed, and immunostained with mouse anti-LC3B and rabbit anti-LC3A, mouse anti-LAMP2 and rabbit anti-LC3A or rabbit anti-LC3B and mouse anti-LAMP2 antibodies. Cells were visualized using Alexa Fluor 488 goat anti-rabbit antibody or Alexa Fluor 555 goat anti-mouse. DAPI was used as counterstain to visualize the nucleus. SS = serum starved, CLQ = chloroquine

**D.** Flow cytometry-based profiling of CYTO-ID Autophagy detection in CCHE-45 and SH-SY5Y cells. Cells were untreated or treated with 500 nM rapamycin, 50  $\mu$ M chloroquine or both for 18 hours. Results are presented as histogram overlay. All experiments were performed three times. Rapa = rapamycin, CLQ = chloroquine.

**Figure S3: Silencing of LC3A expression in CPC tumors**

**A.** BrainSpan data analysis. *LC3A* and *LC3B* gene expression as a function of different developmental stages (upper panel) and as a function of different regions of the brain (lower panel) using RNA-Seq data from the BrainSpan Project. Expression of *LC3A* and *LC3B* was detected in all developmental stages and in different parts of the brain. pcw = post conception weeks, mon = month, yrs = years, Ocx = occipital neocortex, M1C-S1C = primary motor-sensory cortex, AMY = amygdaloid complex, MGE = medial ganglionic somatosensory cortex, CB = cerebellum, CBC = cerebellar cortex , MD = mediodorsal nucleus of thalamus.

**B.** Schematic representation of *LC3A* exon-intron structure showing the difference in transcriptional start site between *LC3A-V1* and *LC3A-V2*.

**C.** Immunohistochemical analysis of *LC3A* and *LC3B* in CCHE-45 original tumor. *LC3A* was detected in normal brain tissue (region a) while tumor area (region b) was negative for *LC3A* expression. On the other hand *LC3B* expression was detected in normal and tumor tissue region (c and d) respectively.

**D.** Bisulfite sequencing for CCHE-45 original tumor. Region 2 was amplified using R2 primer set. Methylated CG dinucleotides are indicated by black circles.

**Figure S4: LC3A-V1 expression in CCHE-45 and HEK293-T cells.**



**A.** Immunofluorescence analysis of CCHE-45 cells transfected for 48 hours with empty vector or LC3A-V1. Cells were stained with rabbit anti-LC3A, mouse anti-LC3B, rabbit anti-vimentin or mouse anti-LAMP2. Bound antibodies were visualized using Alexa Fluor 555 goat anti-mouse or Alexa Fluor 555 goat anti-rabbit. DAPI was used to visualize the nucleus. .GFP protein was visualized without staining.

**B.** Western blot analysis for HEK293-T cells transfected with empty vector or LC3A-V1. GFP expression was only detected in transfected cells. GAPDH was used as loading control. EV = empty vector, Ctrl = control.

**Figure S5: Western blots scans**

Scanned Western blots; A = figure 1C, B = figure 2A, C = figure 2D, D = figure 3C, E = figure 4A, F = figure 2SB, G = Figure 4SB.
